# Supplementary material for: Assessment of Long-Term Complications in Adult Oncology Patients with Superior Vena Cava Syndrome Receiving Tunnelled Femoral Catheters: A Prospective Cross-sectional Study
Source: Research Square preprint supplement (doi:10.21203/rs.3.rs-5778445/v1), 2025-01-15
Supplement: Supplementary file 1 [file 0e3131b32d865eb40635c536.docx]

| **Terminology** | **Definition** |
| --- | --- |
| **Dislodgment** | Dislodgement refers to a PICC moving from its original position by 3 cm or more. |
| **Occlusion** | Inability to withdraw blood and inability to infuse fluid. |
| **Blood reflux** | Blood reflux into the VAD lumen. |
| **CASI** | Catheter-associated skin impairment (CASI) refers to drainage, erythema, or other skin abnormalities such as vesicles, bullae, erosion, or tears at a CVAD site beneath the dressing, lasting 30 minutes or more after the dressing is removed. |
| **Thrombosis** | Color Doppler ultrasound was used to detect the existence of thrombosis immediately if suspected symptoms of PICC-related venous thrombosis occurred, |
| **Unplanned removal** | Unplanned extubation refers to the uncontrolled and accidental removal of the catheter. |
| **Catheter damage** | Catheter with visible fractures and leaks at the site. |
| **CLABSI** | A central line-associated bloodstream infection (CLABSI) occurs when a pathogen is isolated from a blood culture in a patient who had a central line either at the time of infection or within 48 hours prior. |
| CASI: Catheter-associated skin impairment  CLABSI: Central line-associated bloodstream infection | |

**Supplement File 1**

**The definitions of complications**
